# Supplementary material for: Racial–Geographic Disparity in Lipid Management in Veterans with Type 2 Diabetes: A 10-Year Retrospective Cohort Study
Source: PubMed Central journal article supplement (PMC6767165; doi:10.1089/heq.2019.0071), 2019-09-23

## Supplementary Data

**Supplementary Table S1. Model for Predicting Missing Low-Density Lipoprotein Data**

|                                         | Logit model with HbA1C | Logit Model without HbA1C |
|-----------------------------------------|------------------------|---------------------------|
| Year (per year)                         | 1.09 (1.09, 1.09)      | 1.09 (1.09, 1.10)         |
| Age (per year)                          | 1.00 (1.00, 1.00)      | 1.00 (1.00, 1.00)         |
| Elixhauser comorbidities <sup>a</sup>   | 1.01 (0.99, 1.02)      | 1.02 (1.02, 1.02)         |
| Primary care visits (per annual visit)  | 0.99 (0.99, 0.99)      | 0.99 (0.99, 0.99)         |
| Race/ethnicity: non-Hispanic black      | 1.01 (0.99, 1.02)      | 1.00 (0.98, 1.02)         |
| Race/ethnicity: Hispanic                | 1.00 (0.97, 1.02)      | 0.98 (0.96, 1.01)         |
| Race/ethnicity: other                   | 1.02 (1.00, 1.03)      | 0.90 (0.86, 0.92)         |
| Dual use status: 50–80% VHA             | 1.00 (0.99, 1.01)      | 1.00 (0.99, 1.01)         |
| Dual use status: 50% VHA                | 0.99 (0.97, 1.00)      | 1.00 (0.98, 1.01)         |
| Sex: female                             | 0.94 (0.90, 0.99)      | 0.93 (0.89, 0.98)         |
| Marital status: unmarried               | 1.07 (1.06, 1.08)      | 1.07 (1.06, 1.08)         |
| Disability >50%                         | 0.90 (0.89, 0.92)      | 0.90 (0.89, 0.91)         |
| Smoking status = yes                    | 0.95 (0.94, 0.97)      | 0.95 (0.94, 0.97)         |
| Statins prescribed: intense vs. regular | 0.02 (0.02, 0.02)      | 0.02 (0.02, 0.02)         |
| HbA1C >8%                               | 1.15 (1.14, 1.17)      | —                         |
| Acute coronary syndrome                 | 1.04 (1.03, 1.06)      | 1.05 (1.03, 1.06)         |
| Atherosclerotic cerebrovascular disease | 1.04 (1.03, 1.06)      | 1.04 (1.03, 1.06)         |
| Coronary heart disease                  | 1.18 (1.16, 1.20)      | 1.18 (1.17, 1.20)         |
| Peripheral artery disease               | 1.05 (1.04, 1.06)      | 1.05 (1.04, 1.06)         |

<sup>a</sup>Per additional comorbidity.

VHA, Veterans Health Administration.

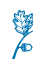

Supplement: Supp_Table1.pdf [file Supp_Table1.pdf]
